# Supplementary material for: Fluctuations in coral reef fish densities after environmental disturbances on the northern Great Barrier Reef
Source: PeerJ journal article supplement (doi:10.7717/peerj.6720), 2019-04-08

Individuals per 150 m<sup>2</sup>

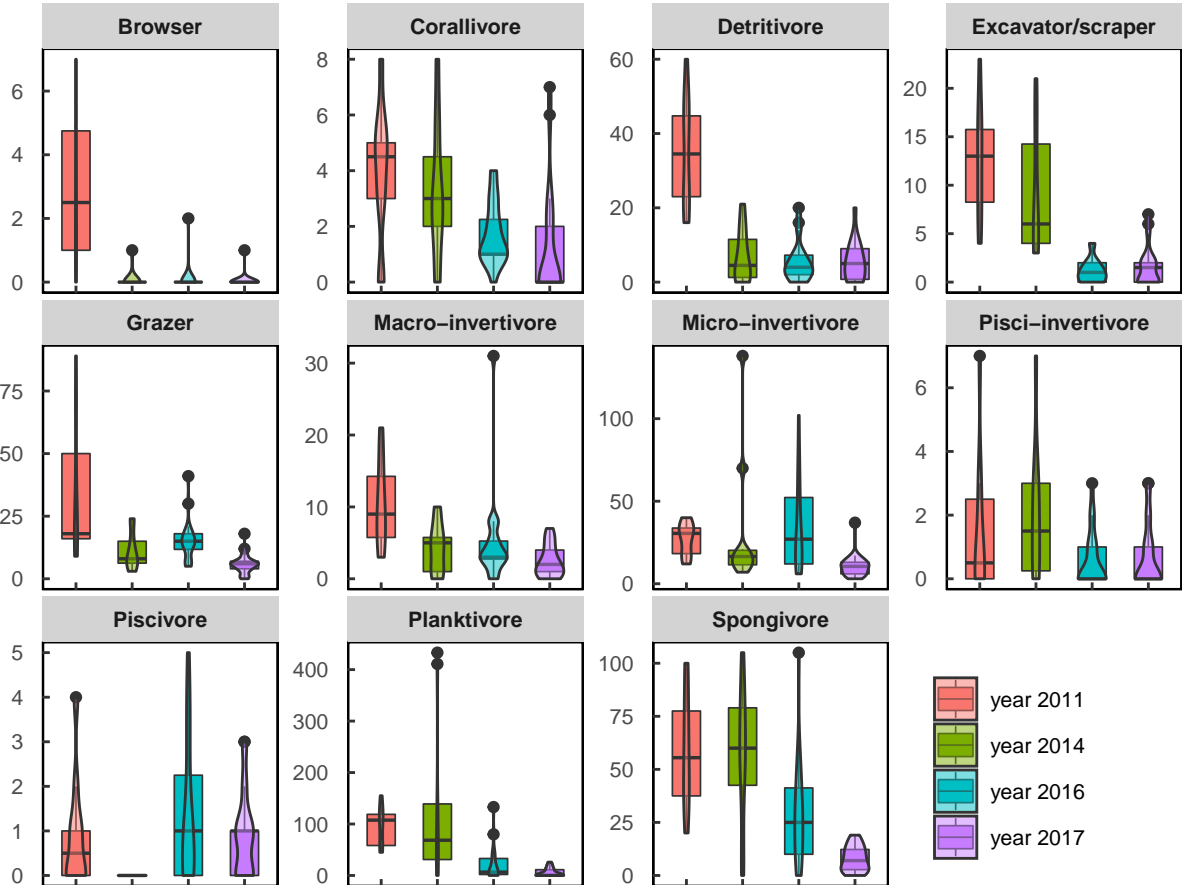

Supplement: Fig_S2.pdf [file Fig_S2.pdf]
