# Supplementary material for: Fluctuations in coral reef fish densities after environmental disturbances on the northern Great Barrier Reef
Source: PubMed Central journal article supplement (PMC6459176; doi:10.7717/peerj.6720), 2019-04-08

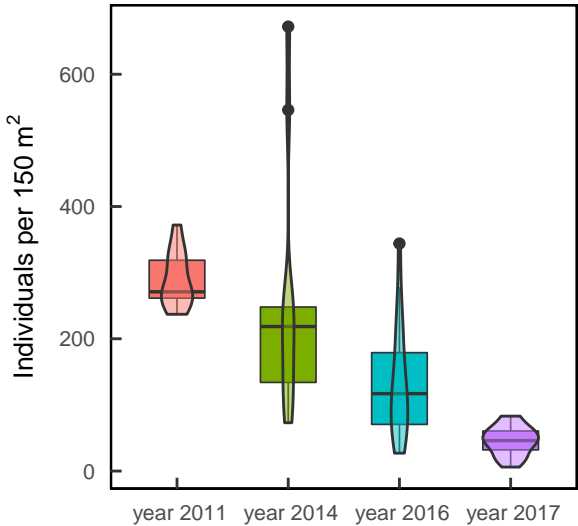

Supplement: peerj-07-6720-s001.pdf [file peerj-07-6720-s001.pdf]
